# Supplementary material for: Genome-wide identification of ABA receptor PYL family and expression analysis of PYLs in response to ABA and osmotic stress in Gossypium
Source: PeerJ. 2017 Dec 6;5:e4126. doi: 10.7717/peerj.4126 (PMC5723141; doi:10.7717/peerj.4126)
Supplement: Table S5 [file peerj-05-4126-s007.xlsx]

## Sheet: Sheet1
Table S5 Ka/Ks values of homologous gene pairs
Ga to Ga
Cotton_A_24449	Cotton_A_14394	0.0769755
Cotton_A_23205	Cotton_A_14394	1
Cotton_A_14394	Cotton_A_17740	1
Cotton_A_20366	Cotton_A_36156	1
Cotton_A_23205	Cotton_A_13258	#DIV/0!
Cotton_A_23205	Cotton_A_17740	0.049231
Cotton_A_08084	Cotton_A_20366	0.0911201
Cotton_A_20366	Cotton_A_17740	0.0868425
Cotton_A_22319	Cotton_A_00296	0.0780992
Cotton_A_09168	Cotton_A_07906	0.2801
Cotton_A_07906	Cotton_A_23118	0.122963
Cotton_A_11270	Cotton_A_17533	0.206555
Cotton_A_09168	Cotton_A_23118	0.121297
Cotton_A_13999	Cotton_A_11886	0.0882746
Cotton_A_05614	Cotton_A_13999	0.1048
Gh to Gh
Gh_A08G1117	Gh_A11G0870	0.0705852
Gh_A08G1117	Gh_A12G1895	0.27657
Gh_A05G0336	Gh_A08G1117	1
Gh_A08G1117	Gh_D05G0441	1
Gh_A08G1117	Gh_D08G1399	0.0796073
Gh_A08G1117	Gh_D11G1013	0.0664316
Gh_A11G0870	Gh_D08G1399	0.072297
Gh_A12G1895	Gh_D08G1399	0.24799
Gh_D08G1399	Gh_D11G1013	0.0758522
Gh_A09G1646	Gh_D11G1013	1
Gh_A11G0870	Gh_D11G1013	0.108351
Gh_A11G0224	Gh_D11G1013	1
Gh_A12G2127	Gh_D11G1013	1
Gh_A12G2278	Gh_D11G1013	1
Gh_A05G0336	Gh_D11G1013	1
Gh_D05G0441	Gh_D11G1013	1
Gh_D09G1740	Gh_D11G1013	1
Gh_D11G0238	Gh_D11G1013	1
Gh_D11G1013	Gh_D12G2306	0.0440046
Gh_A05G0336	Gh_A11G0870	1
Gh_A08G2221	Gh_A11G0870	1
Gh_A09G1646	Gh_A11G0870	1
Gh_A10G0677	Gh_A11G0870	0.58477
Gh_A11G0224	Gh_A11G0870	1
Gh_A11G0870	Gh_A12G2127	1
Gh_A11G0870	Gh_A12G2278	1
Gh_A11G0870	Gh_D05G0441	1
Gh_A11G0870	Gh_D08G2587	1
Gh_A11G0870	Gh_D09G1740	1
Gh_A11G0870	Gh_D10G0710	0.362241
Gh_A11G0870	Gh_D11G0238	1
Gh_A11G0870	Gh_D11G0290	1
Gh_A11G0870	Gh_D12G2306	0.0302042
Gh_A12G2278	Gh_D04G0019	0.0804484
Gh_A05G3585	Gh_D04G0019	0.236783
Gh_A10G0677	Gh_A11G0224	0.5155
Gh_A11G0224	Gh_A12G2127	0.128345
Gh_A11G0224	Gh_D11G0238	0.139342
Gh_A11G0224	Gh_D12G2306	0.118996
Gh_A10G0677	Gh_D11G0238	0.536822
Gh_A12G2127	Gh_D11G0238	0.111307
Gh_D11G0238	Gh_D12G2306	0.110522
Gh_A05G3585	Gh_A09G1646	0.0891523
Gh_A05G3585	Gh_A12G2278	0.0836351
Gh_A05G3585	Gh_D09G1740	0.0821236
Gh_A09G1646	Gh_A12G2127	0.0357611
Gh_A12G2127	Gh_A12G2278	1
Gh_A12G2127	Gh_D09G1740	0.0499076
Gh_A12G2127	Gh_D12G2306	0.356499
Gh_A09G1646	Gh_D12G2306	0.0554605
Gh_A12G2278	Gh_D12G2306	1
Gh_D09G1740	Gh_D12G2306	0.0668044
Gh_A12G2278	Gh_D09G1740	0.120992
Gh_A09G1646	Gh_D09G1740	0.0745835
Gh_A09G1646	Gh_A12G2278	0.121286
Gh_A06G1418	Gh_A10G2142	0.217907
Gh_A06G1418	Gh_D06G1764	0.141129
Gh_A06G1418	Gh_D10G2388	0.21092
Gh_A10G2142	Gh_D06G1764	0.204981
Gh_D06G1764	Gh_D10G2388	0.202946
Gh_A10G2142	Gh_D10G2388	0.360562
Gh_A05G2630	Gh_D05G2920	0.053664
Gh_D01G2250	Gh_A09G2421	0.0787561
Gh_D09G1585	Gh_A09G2421	0.070755
Gh_A01G1990	Gh_A09G2421	0.072939
Gh_D01G2250	Gh_D09G1585	0.091308
Gh_D05G0441	Gh_D09G1585	1
Gh_A01G1990	Gh_D09G1585	0.0810377
Gh_A01G1990	Gh_D01G2250	0.218023
Gh_A05G1297	Gh_D05G1468	0.594448
Gh_A03G0015	Gh_A12G1895	0.120566
Gh_A11G0270	Gh_A12G1895	0.257559
Gh_A12G1895	Gh_D11G0290	0.268935
Gh_A12G1895	Gh_D12G2076	0.116702
Gh_A03G0015	Gh_D12G2076	0.129446
Gh_A11G0270	Gh_D12G2076	0.256354
Gh_D11G0290	Gh_D12G2076	0.267744
Gh_A03G0015	Gh_A11G0270	0.12848
Gh_A03G0015	Gh_D11G0290	0.128285
Gh_A05G0336	Gh_D05G0441	0.0644965
Gh_A08G2221	Gh_D05G0441	0.0752043
Gh_D05G0441	Gh_D07G0193	0.111713
Gh_D05G0441	Gh_D08G2587	0.106427
Gh_D05G0441	Gh_A07G2326	0.104364
Gh_A10G0677	Gh_D10G0710	0.354722
Gh_A05G0336	Gh_A08G2221	0.0716787
Gh_A08G2221	Gh_D07G0193	0.108692
Gh_A08G2221	Gh_D08G2587	0
Gh_A05G0336	Gh_D07G0193	0.104802
Gh_A05G0336	Gh_D08G2587	0.0888822
Gh_D07G0193	Gh_D08G2587	0.123932
Gh_A11G0270	Gh_D11G0290	0.112659
Gh_D07G0193	Gh_A07G2326	0.354704
Ga to Gr
Gorai_004G152300	Cotton_A_24449	0.169928
Gorai_007G107500	Cotton_A_24449	0.0676689
Gorai_004G152300	Cotton_A_14394	0.0744284
Gorai_007G107500	Cotton_A_14394	0.0967832
Gorai_007G026100	Cotton_A_14394	1
Gorai_008G270200	Cotton_A_14394	1
Gorai_008G253700	Cotton_A_14394	0.0342931
Gorai_007G026100	Cotton_A_36156	0.14367
Gorai_007G026100	Cotton_A_13258	0.103642
Gorai_008G253700	Cotton_A_13258	0.278831
Gorai_008G253700	Cotton_A_23205	0.278831
Gorai_008G270200	Cotton_A_23205	0.059161
Gorai_007G107500	Cotton_A_23205	0.0310311
Gorai_007G026100	Cotton_A_23205	0.103642
Gorai_008G270200	Cotton_A_20366	0.101954
Gorai_012G003800	Cotton_A_20366	1.27951
Gorai_006G200700	Cotton_A_20366	0.0839137
Gorai_006G200700	Cotton_A_08084	0.100494
Gorai_007G107500	Cotton_A_08084	1
Gorai_008G270200	Cotton_A_08084	0.144593
Gorai_006G200700	Cotton_A_17740	0.114585
Gorai_007G107500	Cotton_A_17740	1
Gorai_008G253700	Cotton_A_17740	1
Gorai_008G270200	Cotton_A_17740	1.50576
Gorai_012G003800	Cotton_A_17740	0.0783087
Gorai_009G323000	Cotton_A_31479	0
Gorai_011G290300	Cotton_A_31479	0.207293
Gorai_011G290300	Cotton_A_15835	0.402022
Gorai_002G266100	Cotton_A_22319	0.238974
Gorai_006G185000	Cotton_A_22319	0.243569
Gorai_002G266100	Cotton_A_00296	0.118532
Gorai_006G185000	Cotton_A_00296	0.0847059
Gorai_003G181600	Cotton_A_07906	0.14686
Gorai_007G031800	Cotton_A_07906	0.282445
Gorai_008G226500	Cotton_A_07906	0.313785
Gorai_009G162000	Cotton_A_11270	1.09107
Gorai_011G081100	Cotton_A_11801	0.296828
Gorai_003G181600	Cotton_A_23118	0.24304
Gorai_007G031800	Cotton_A_23118	0.122095
Gorai_008G226500	Cotton_A_23118	0.133654
Gorai_001G023000	Cotton_A_11886	0.114248
Gorai_004G287300	Cotton_A_11886	0.186886
Gorai_009G045700	Cotton_A_11886	0.0834504
Gorai_001G023000	Cotton_A_05614	0.680261
Gorai_009G045700	Cotton_A_05614	0.111314
Gorai_009G162000	Cotton_A_17533	0.184752
Gorai_003G181600	Cotton_A_09168	0.161527
Gorai_007G031800	Cotton_A_09168	0.196625
Gorai_008G226500	Cotton_A_09168	0.267768
Gorai_001G023000	Cotton_A_13999	0.112615
Gorai_004G287300	Cotton_A_13999	0.11514
Gorai_009G045700	Cotton_A_13999	0.14524
Ga to Gh
Gh_A08G1117	Cotton_A_24449	0.289573
Gh_A08G1117	Cotton_A_14394	0.0705852
Gh_A08G1117	Cotton_A_17740	1
Gh_A08G1117	Cotton_A_23118	1
Gh_D08G1399	Cotton_A_24449	0.140817
Gh_D08G1399	Cotton_A_14394	0.072297
Gh_D08G1399	Cotton_A_17740	1
Gh_D08G1399	Cotton_A_23118	0.15701
Gh_D11G1013	Cotton_A_23205	1
Gh_D11G1013	Cotton_A_08084	1
Gh_D11G1013	Cotton_A_24449	0.072652
Gh_D11G1013	Cotton_A_14394	0.108351
Gh_D11G1013	Cotton_A_17740	1
Gh_D11G1013	Cotton_A_13258	1
Gh_A11G0870	Cotton_A_23205	1
Gh_A11G0870	Cotton_A_08084	1
Gh_A11G0870	Cotton_A_24449	0.0769755
Gh_A11G0870	Cotton_A_11886	1
Gh_A11G0870	Cotton_A_14394	#DIV/0!
Gh_A11G0870	Cotton_A_17740	1
Gh_A11G0870	Cotton_A_13258	1
Gh_D04G0019	Cotton_A_20366	0.315181
Gh_D04G0019	Cotton_A_17740	0.0804484
Gh_A11G0224	Cotton_A_23205	0.126307
Gh_A11G0224	Cotton_A_14394	1
Gh_A11G0224	Cotton_A_13258	0.126307
Gh_A11G0224	Cotton_A_23118	1
Gh_D11G0238	Cotton_A_23205	0.109278
Gh_D11G0238	Cotton_A_08084	0.0531885
Gh_D11G0238	Cotton_A_14394	1
Gh_D11G0238	Cotton_A_13258	0.109278
Gh_D11G0238	Cotton_A_36156	0.215088
Gh_A05G3585	Cotton_A_20366	0.158673
Gh_A05G3585	Cotton_A_17740	0.0836351
Gh_A12G2127	Cotton_A_23205	0.281328
Gh_A12G2127	Cotton_A_14394	1
Gh_A12G2127	Cotton_A_17740	1
Gh_A12G2127	Cotton_A_13258	0.281328
Gh_D12G2306	Cotton_A_23205	0.371826
Gh_D12G2306	Cotton_A_14394	0.0302042
Gh_D12G2306	Cotton_A_13258	0.371826
Gh_D09G1740	Cotton_A_23205	0.0558333
Gh_D09G1740	Cotton_A_08084	0.100494
Gh_D09G1740	Cotton_A_20366	0.0839137
Gh_D09G1740	Cotton_A_17740	0.120992
Gh_A09G1646	Cotton_A_23205	0.0421513
Gh_A09G1646	Cotton_A_08084	0
Gh_A09G1646	Cotton_A_20366	0.0911201
Gh_A09G1646	Cotton_A_17740	0.121286
Gh_A12G2278	Cotton_A_08084	0.121286
Gh_A12G2278	Cotton_A_20366	0.0868425
Gh_A12G2278	Cotton_A_14394	1
Gh_A12G2278	Cotton_A_17740
Gh_A10G2142	Cotton_A_31479	0.2292
Gh_A10G2142	Cotton_A_15835	0.980488
Gh_A05G2630	Cotton_A_31479	0.329572
Gh_D05G2920	Cotton_A_31479	0
Gh_D10G2388	Cotton_A_15835	0.461447
Gh_D09G1585	Cotton_A_22319	0.070755
Gh_D09G1585	Cotton_A_00296	0.0834732
Gh_A01G1990	Cotton_A_22319	0.0748699
Gh_A01G1990	Cotton_A_00296	0.705354
Gh_D01G2250	Cotton_A_22319	0.0808871
Gh_D01G2250	Cotton_A_00296	0.137944
Gh_D05G1468	Cotton_A_11270	0.897031
Gh_D05G1468	Cotton_A_17533	0.208884
Gh_A12G1895	Cotton_A_09168	0.268523
Gh_A12G1895	Cotton_A_07906	0.322579
Gh_A12G1895	Cotton_A_23118	0.116851
Gh_D12G2076	Cotton_A_09168	0.267331
Gh_D12G2076	Cotton_A_07906	0.179167
Gh_D12G2076	Cotton_A_23118	0.1257
Gh_A03G0015	Cotton_A_09168	0.124675
Gh_A03G0015	Cotton_A_07906	0.126755
Gh_A03G0015	Cotton_A_23118	0
Gh_D05G0441	Cotton_A_05614	0.10835
Gh_D05G0441	Cotton_A_13999	0.116211
Gh_D05G0441	Cotton_A_11886	0.0763279
Gh_D10G0710	Cotton_A_11801	0.237192
Gh_A08G2221	Cotton_A_13999	0.0871332
Gh_A08G2221	Cotton_A_11886	0
Gh_A05G0336	Cotton_A_13999	0.118365
Gh_A05G0336	Cotton_A_05614	0.101582
Gh_A05G0336	Cotton_A_11886	0.072775
Gh_D08G2587	Cotton_A_13999	0.105944
Gh_D08G2587	Cotton_A_11886	0.15603
Gh_A05G1297	Cotton_A_11270	0.480041
Gh_A05G1297	Cotton_A_17533	0.192344
Gh_A11G0270	Cotton_A_09168	0.483213
Gh_A11G0270	Cotton_A_07906	0.268645
Gh_D07G0193	Cotton_A_05614	0.80368
Gh_D07G0193	Cotton_A_13999	0.108015
Gh_D07G0193	Cotton_A_11886	0.109813
Gh_D07G0193	Cotton_A_17533	0.244741
Gh_D11G0290	Cotton_A_09168	0.173644
Gh_D11G0290	Cotton_A_07906	0.280582
Gh_D11G0290	Cotton_A_23118	0.124882
Gh_A10G0677	Cotton_A_11801	1.07691
Gr to Gh
Gh_A08G1117	Gorai_004G152300	0.0934025
Gh_A08G1117	Gorai_007G107500	0.0614795
Gh_A08G1117	Gorai_008G270200	1
Gh_A08G1117	Gorai_009G045700	1
Gorai_004G152300	Gh_D08G1399	0
Gorai_007G107500	Gh_D08G1399	0.0710804
Gorai_008G270200	Gh_D08G1399	1
Gorai_004G152300	Gh_D11G1013	0.0780928
Gorai_006G200700	Gh_D11G1013	1
Gorai_007G107500	Gh_D11G1013	0.603196
Gorai_007G026100	Gh_D11G1013	1
Gorai_008G253700	Gh_D11G1013	0.0438272
Gorai_008G270200	Gh_D11G1013	1
Gorai_009G045700	Gh_D11G1013	1
Gh_A11G0870	Gorai_004G152300	0.0744284
Gh_A11G0870	Gorai_006G200700	1
Gh_A11G0870	Gorai_007G107500	0.0967832
Gh_A11G0870	Gorai_007G026100	1
Gh_A11G0870	Gorai_008G253700	0.0342931
Gh_A11G0870	Gorai_008G270200	1
Gh_A11G0870	Gorai_009G045700	1
Gorai_008G270200	Gh_D04G0019	0.0960863
Gorai_012G003800	Gh_D04G0019	0
Gh_A11G0224	Gorai_007G026100	0.0698044
Gh_A11G0224	Gorai_007G107500	1
Gh_A11G0224	Gorai_008G253700	0.109277
Gorai_007G026100	Gh_D11G0238	0.140631
Gorai_007G107500	Gh_D11G0238	0.0334069
Gorai_008G253700	Gh_D11G0238	0.101631
Gh_A05G3585	Gorai_006G200700	0.0821236
Gh_A05G3585	Gorai_008G270200	0.0986879
Gh_A05G3585	Gorai_012G003800	0.31728
Gh_A12G2127	Gorai_006G200700	0.0499076
Gh_A12G2127	Gorai_007G026100	0.10588
Gh_A12G2127	Gorai_007G107500	1
Gh_A12G2127	Gorai_008G253700	0.277233
Gorai_006G200700	Gh_D12G2306	0.0668044
Gorai_007G026100	Gh_D12G2306	0.104708
Gorai_007G107500	Gh_D12G2306	0.0518546
Gorai_008G253700	Gh_D12G2306	0.863685
Gorai_008G270200	Gh_D12G2306	1
Gorai_006G200700	Gh_D09G1740	0
Gorai_007G107500	Gh_D09G1740	1
Gorai_008G270200	Gh_D09G1740	0.144233
Gorai_012G003800	Gh_D09G1740	0.0790162
Gh_A09G1646	Gorai_006G200700	0.0745835
Gh_A09G1646	Gorai_007G107500	1
Gh_A09G1646	Gorai_008G270200	0.136898
Gh_A09G1646	Gorai_012G003800	0.0858058
Gh_A12G2278	Gorai_006G200700	0.114585
Gh_A12G2278	Gorai_007G107500	1
Gh_A12G2278	Gorai_008G270200	1.50576
Gh_A12G2278	Gorai_012G003800	0.0783087
Gorai_008G270200	Gh_D12G2694	0.496777
Gh_A06G1418	Gorai_009G323000	0.193166
Gh_A06G1418	Gorai_010G194800	0.128771
Gh_A06G1418	Gorai_011G290300	0.206175
Gorai_010G194800	Gh_D06G1764	0
Gorai_011G290300	Gh_D06G1764	0.198343
Gh_A10G2142	Gorai_010G194800	0.200335
Gh_A10G2142	Gorai_011G290300	0.319102
Gh_A05G2630	Gorai_009G323000	0.0457925
Gorai_009G323000	Gh_D05G2920	0
Gorai_010G194800	Gh_D10G2388	0.198343
Gorai_011G290300	Gh_D10G2388	0
Gorai_002G266100	Gh_A09G2421	0.234181
Gorai_006G185000	Gh_A09G2421	0.243569
Gorai_006G185000	Gh_D09G1585	0.045729
Gorai_009G045700	Gh_D09G1585	1
Gorai_002G266100	Gh_D09G1585	0.244031
Gh_A01G1990	Gorai_002G266100	0.302287
Gh_A01G1990	Gorai_006G185000	0.0818773
Gorai_002G266100	Gh_D01G2250	0.509075
Gorai_006G185000	Gh_D01G2250	0.0885191
Gorai_009G162000	Gh_D05G1468	0.36121
Gh_A12G1895	Gorai_003G181600	0.141791
Gh_A12G1895	Gorai_004G152300	0.24799
Gh_A12G1895	Gorai_007G031800	0.270682
Gh_A12G1895	Gorai_008G226500	0.222461
Gorai_003G181600	Gh_D12G2076	0.149403
Gorai_007G031800	Gh_D12G2076	0.269488
Gorai_008G226500	Gh_D12G2076	0.209319
Gh_A03G0015	Gorai_003G181600	0.24304
Gh_A03G0015	Gorai_007G031800	0.125462
Gh_A03G0015	Gorai_008G226500	0.137435
Gorai_001G023000	Gh_D05G0441	0.116372
Gorai_004G287300	Gh_D05G0441	0.113595
Gorai_004G152300	Gh_D05G0441	1
Gorai_009G045700	Gh_D05G0441	0.150747
Gorai_007G107500	Gh_D10G0710	0.35627
Gorai_011G081100	Gh_D10G0710	0.301128
Gh_A08G2221	Gorai_001G023000	0.113102
Gh_A08G2221	Gorai_004G287300	0.0617461
Gh_A08G2221	Gorai_009G045700	0.0823046
Gh_A05G0336	Gorai_001G023000	0.109217
Gh_A05G0336	Gorai_004G287300	0.0965993
Gh_A05G0336	Gorai_004G152300	1
Gh_A05G0336	Gorai_009G045700	0.0967288
Gorai_001G023000	Gh_D08G2587	0.128708
Gorai_004G287300	Gh_D08G2587	0.601129
Gorai_009G045700	Gh_D08G2587	0.115127
Gh_A05G1297	Gorai_009G162000	0.281519
Gh_A11G0270	Gorai_003G181600	0.160392
Gh_A11G0270	Gorai_007G031800	0.124743
Gh_A11G0270	Gorai_008G226500	0.256623
Gorai_001G023000	Gh_A07G2326	0.345928
Gorai_009G045700	Gh_A07G2326	0.107256
Gorai_009G045700	Gh_D07G0193	0.114823
Gorai_001G023000	Gh_D07G0193	0.100284
Gorai_003G181600	Gh_D11G0290	0.13724
Gorai_007G031800	Gh_D11G0290	0
Gorai_007G107500	Gh_D11G0290	0.244089
Gorai_008G226500	Gh_D11G0290	0.268177
Gh_A10G0677	Gorai_007G107500	0.575645
Gh_A10G0677	Gorai_007G026100	0.530308
Gh_A10G0677	Gorai_011G081100	0.40905
Gr to Gr
Gorai_001G023000	Gorai_004G287300	0.128915
Gorai_001G023000	Gorai_009G045700	0.119521
Gorai_002G266100	Gorai_006G185000	0.248206
Gorai_003G181600	Gorai_007G031800	0.134108
Gorai_003G181600	Gorai_008G226500	0.157611
Gorai_004G152300	Gorai_007G107500	0.0731798
Gorai_004G152300	Gorai_008G270200	1
Gorai_004G152300	Gorai_009G045700	1
Gorai_004G287300	Gorai_009G045700	0.122931
Gorai_006G200700	Gorai_007G107500	1
Gorai_006G200700	Gorai_008G270200	0.136549
Gorai_006G200700	Gorai_012G003800	0.0790162
Gorai_007G026100	Gorai_007G107500	1
Gorai_007G026100	Gorai_008G253700	0.0959587
Gorai_007G031800	Gorai_008G226500	0.269911
Gorai_007G107500	Gorai_008G270200	1
Gorai_007G107500	Gorai_009G045700	1
Gorai_007G107500	Gorai_008G253700	0.0509262
Gorai_008G253700	Gorai_008G270200	1
Gorai_008G270200	Gorai_012G003800	0.0934998
Gorai_010G194800	Gorai_011G290300	0.193853
