# Supplementary material for: Genome-wide identification of ABA receptor PYL family and expression analysis of PYLs in response to ABA and osmotic stress in Gossypium
Source: PeerJ. 2017 Dec 6;5:e4126. doi: 10.7717/peerj.4126 (PMC5723141; doi:10.7717/peerj.4126)
Supplement: Table S6 [file peerj-05-4126-s008.xlsx]

## Sheet: Sheet1
Table S6 The name of PYL gene pairs had nearly identical amino acid sequences
	nearly identical amino acid
Cotton_A_13258（GaPYL9-4）	Cotton_A_23205（GaPYL9-5）
Cotton_A_23118（GaPYR1-1）	Gh_A03G0015（GhPYR1-1A）
Cotton_A_08084（GaPYL9-6）	Gh_A09G1646（GhPYL9-6A）
Cotton_A_22319（GaPYL4-2）	Gh_A09G2421（GhPYL4-2A）
Cotton_A_17740（GaPYL9-8）	Gh_A12G2278（GhPYL9-8A）
Cotton_A_31479（GaPYL4-3）	Gh_D05G2920（GhPYL4-3D）	Gorai.009G323000.1（GrPYL4-3）
Gorai.009G323000.1（GrPYL4-3）	Gh_D06G1764（GhPYL6-2D）
Gorai.004G152300.1（GrPYL9-2）	Gh_D08G1399（GhPYL9-2D）
Gorai.007G031800.1（GrPYR1-2）	Gh_D11G0290（GhPYR1-2D）
Cotton_A_17533（GaPYL6-2）	GOBAR_AA15331（GbPYL6-2A'）
Gh_A10G2142（GhPYL6-1A）	GOBAR_AA18332（GbPYL6-1A）
Gh_A05G0336（GhPYL2-1A）	GOBAR_AA31030（GbPYL2-1A）
Gh_A12G2127（GhPYL9-5A）	GOBAR_AA38557（GbPYL9-5A）
Gh_D11G0238（GhPYL9-4D）	GOBAR_DD09701（GbPYL4-3D）	GOBAR_AA01168（GbPYL4-3A）
Gorai.006G200700.1（GrPYL9-6）	Gh_D09G1740（GhPYL9-6D）	GOBAR_DD17050（GbPYL9-6D）
Gorai.011G290300.1（GrPYL6-1）	Gh_D10G2388（GhPYL6-1D）	GOBAR_DD29255（GbPYL6-1D）
Gorai.012G003800.1（GrPYL9-3）	Gh_D04G0019（GhPYL9-3D）	GOBAR_DD31179（GbPYL9-3D）
Cotton_A_14394（GaPYL9-2）	Gh_A11G0870（GhPYL9-2A）	GOBAR_DD37081（GbPYL9-1D）
GOBAR_DD10391（GbPYL2-2D）	GOBAR_DD38339（GbPYL2-2D'）
